# Supplementary material
Source: PubMed Central journal article supplement (PMC5606228)

# Yang Figure S1

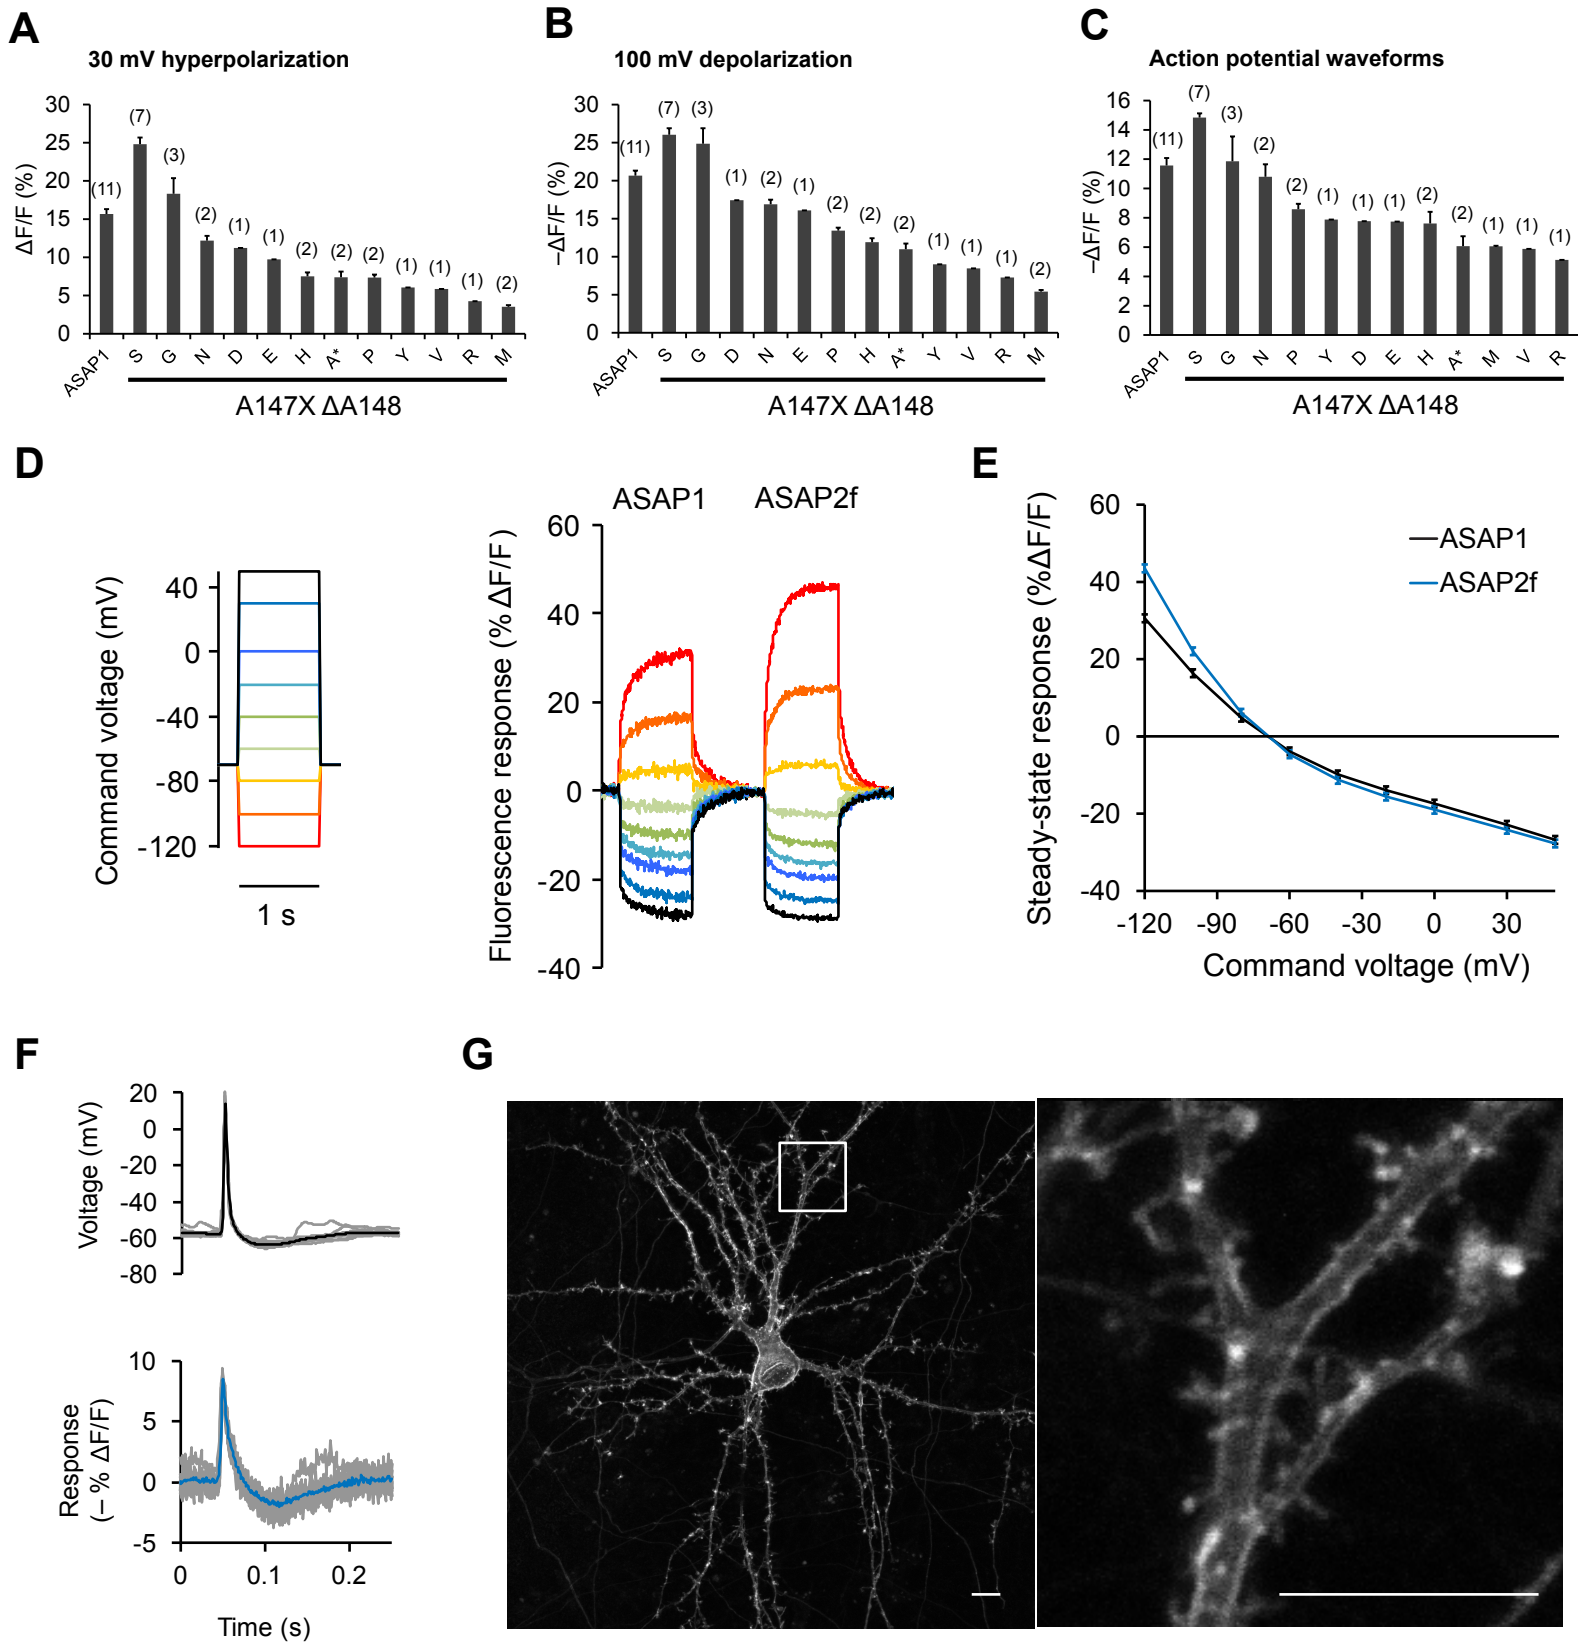

Supplement: NIHMS785612-supplement-1.pdf [file NIHMS785612-supplement-1.pdf]

# Yang Figure S2

**A**

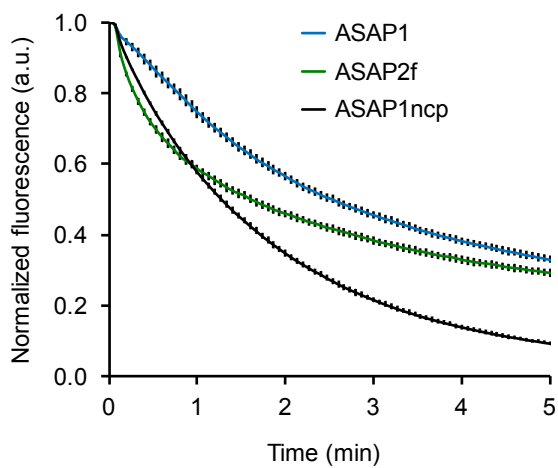

**B**

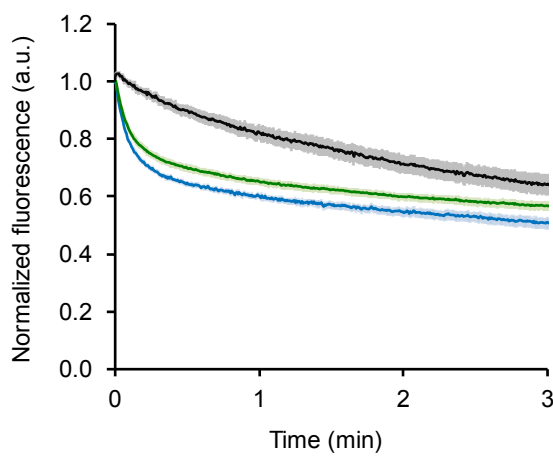

**C**

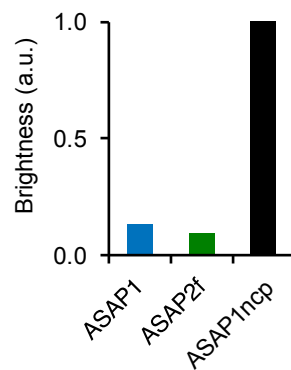

**D**

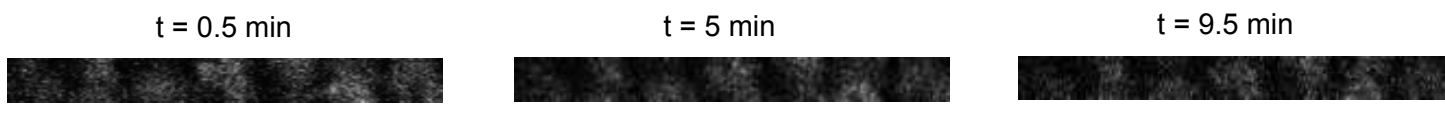

**E**

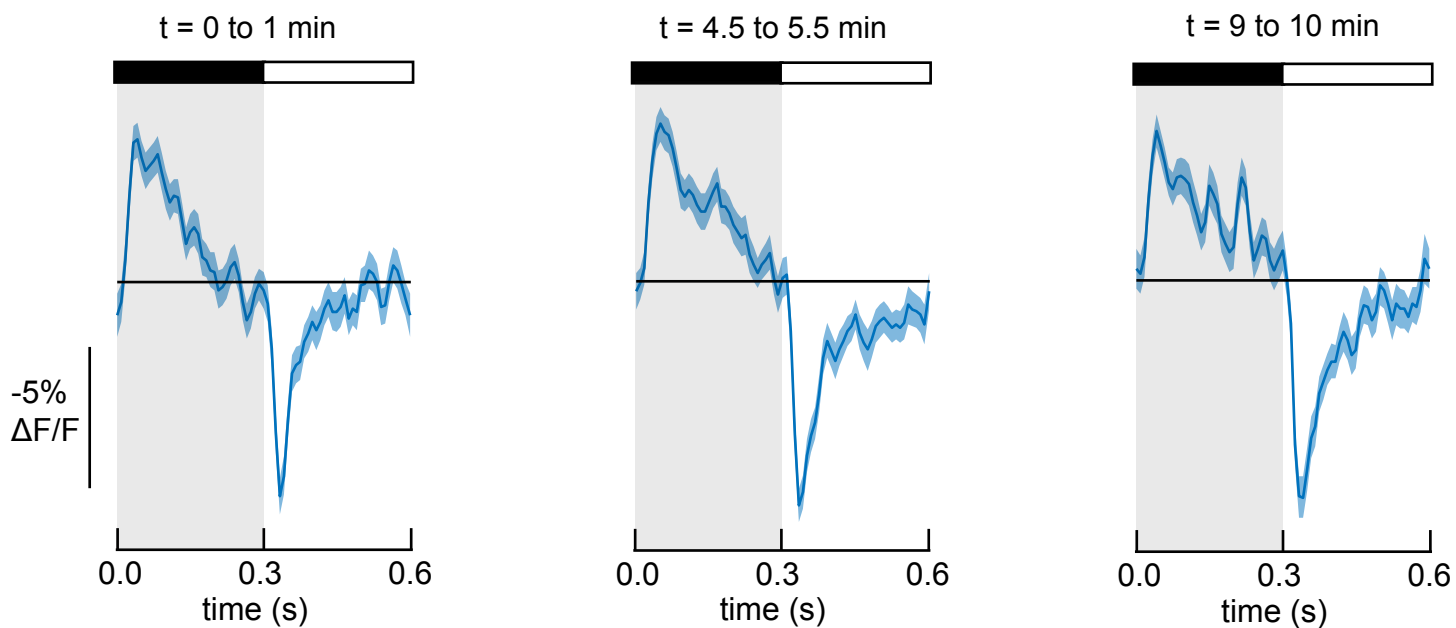

Supplement: NIHMS785612-supplement-2.pdf [file NIHMS785612-supplement-2.pdf]

# Yang Figure S3

## A Layer M2

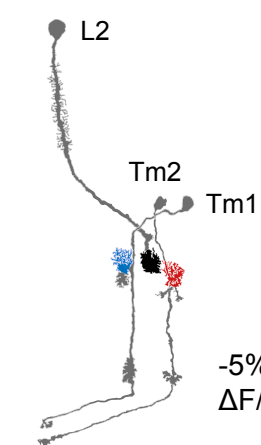

## B Dark

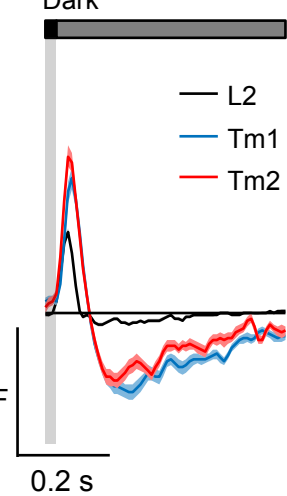

## C

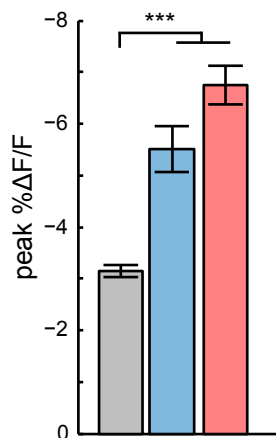

## D

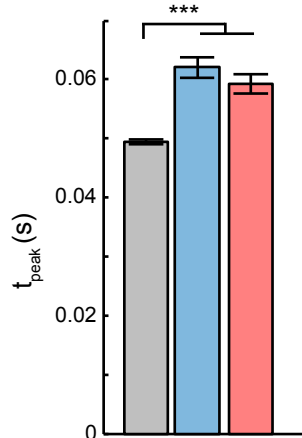

## E

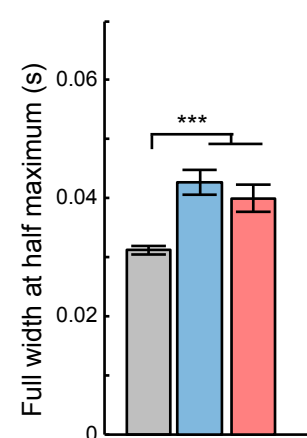

## F Layer M1

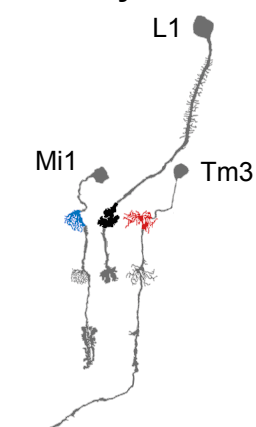

## G Dark

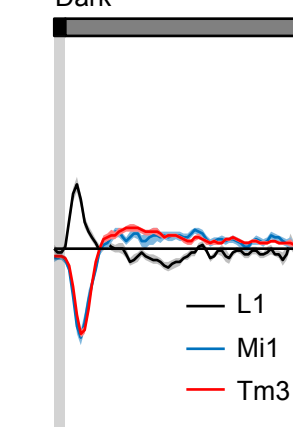

## H

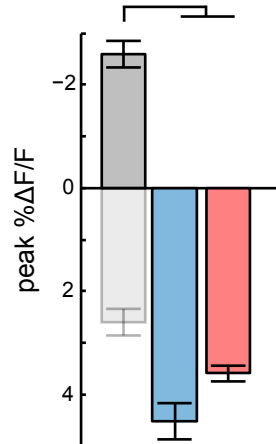

## I

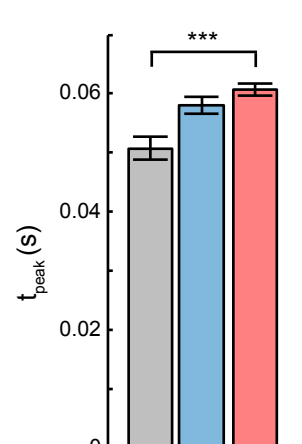

## J

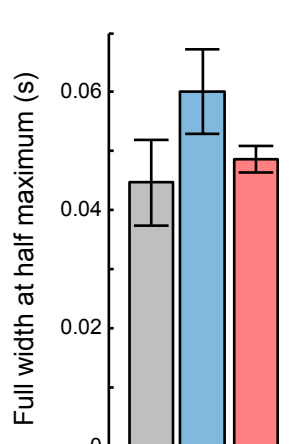

## K Layer M5

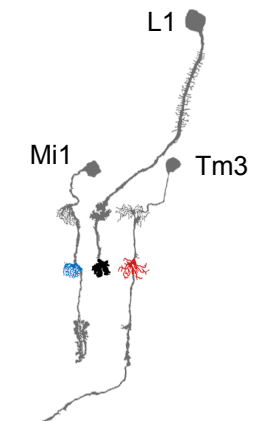

## L Dark

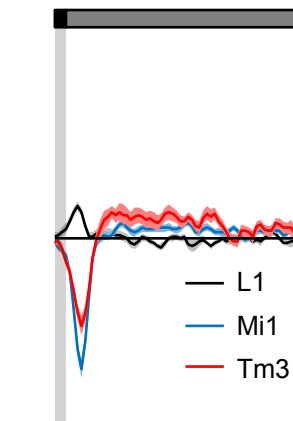

## M

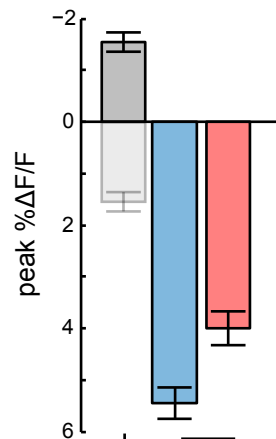

## N

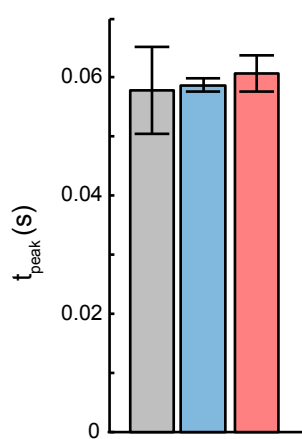

## O

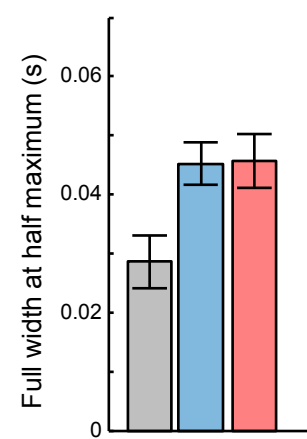

Supplement: NIHMS785612-supplement-3.pdf [file NIHMS785612-supplement-3.pdf]

# Yang Figure S4

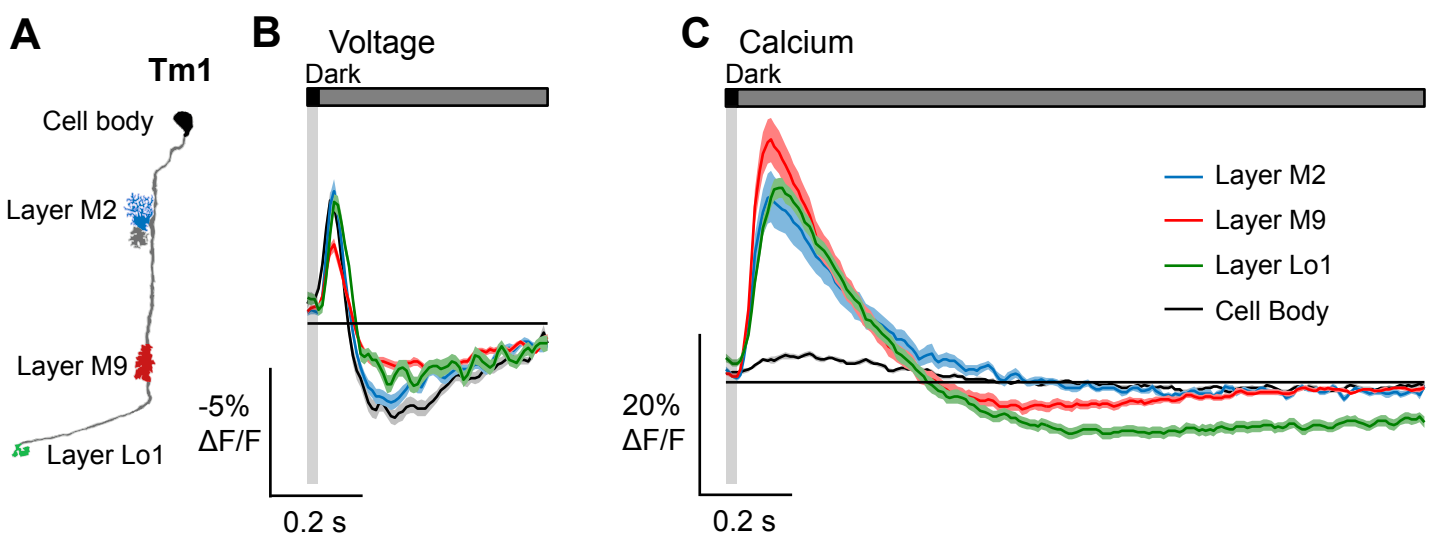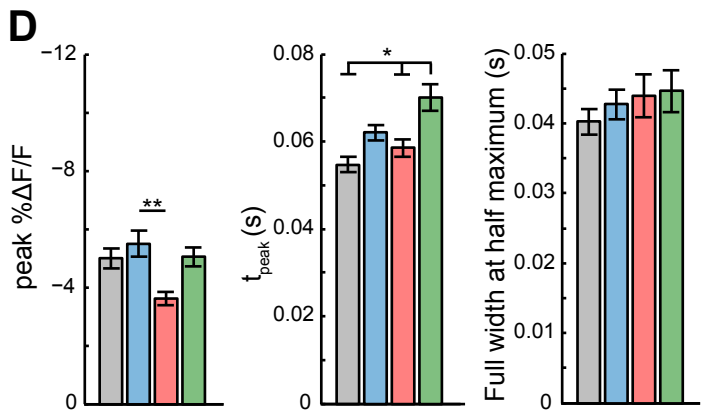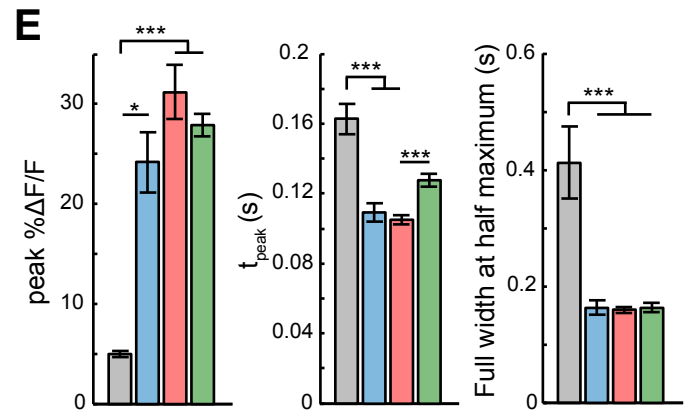

Supplement: NIHMS785612-supplement-4.pdf [file NIHMS785612-supplement-4.pdf]

# Yang Figure S5

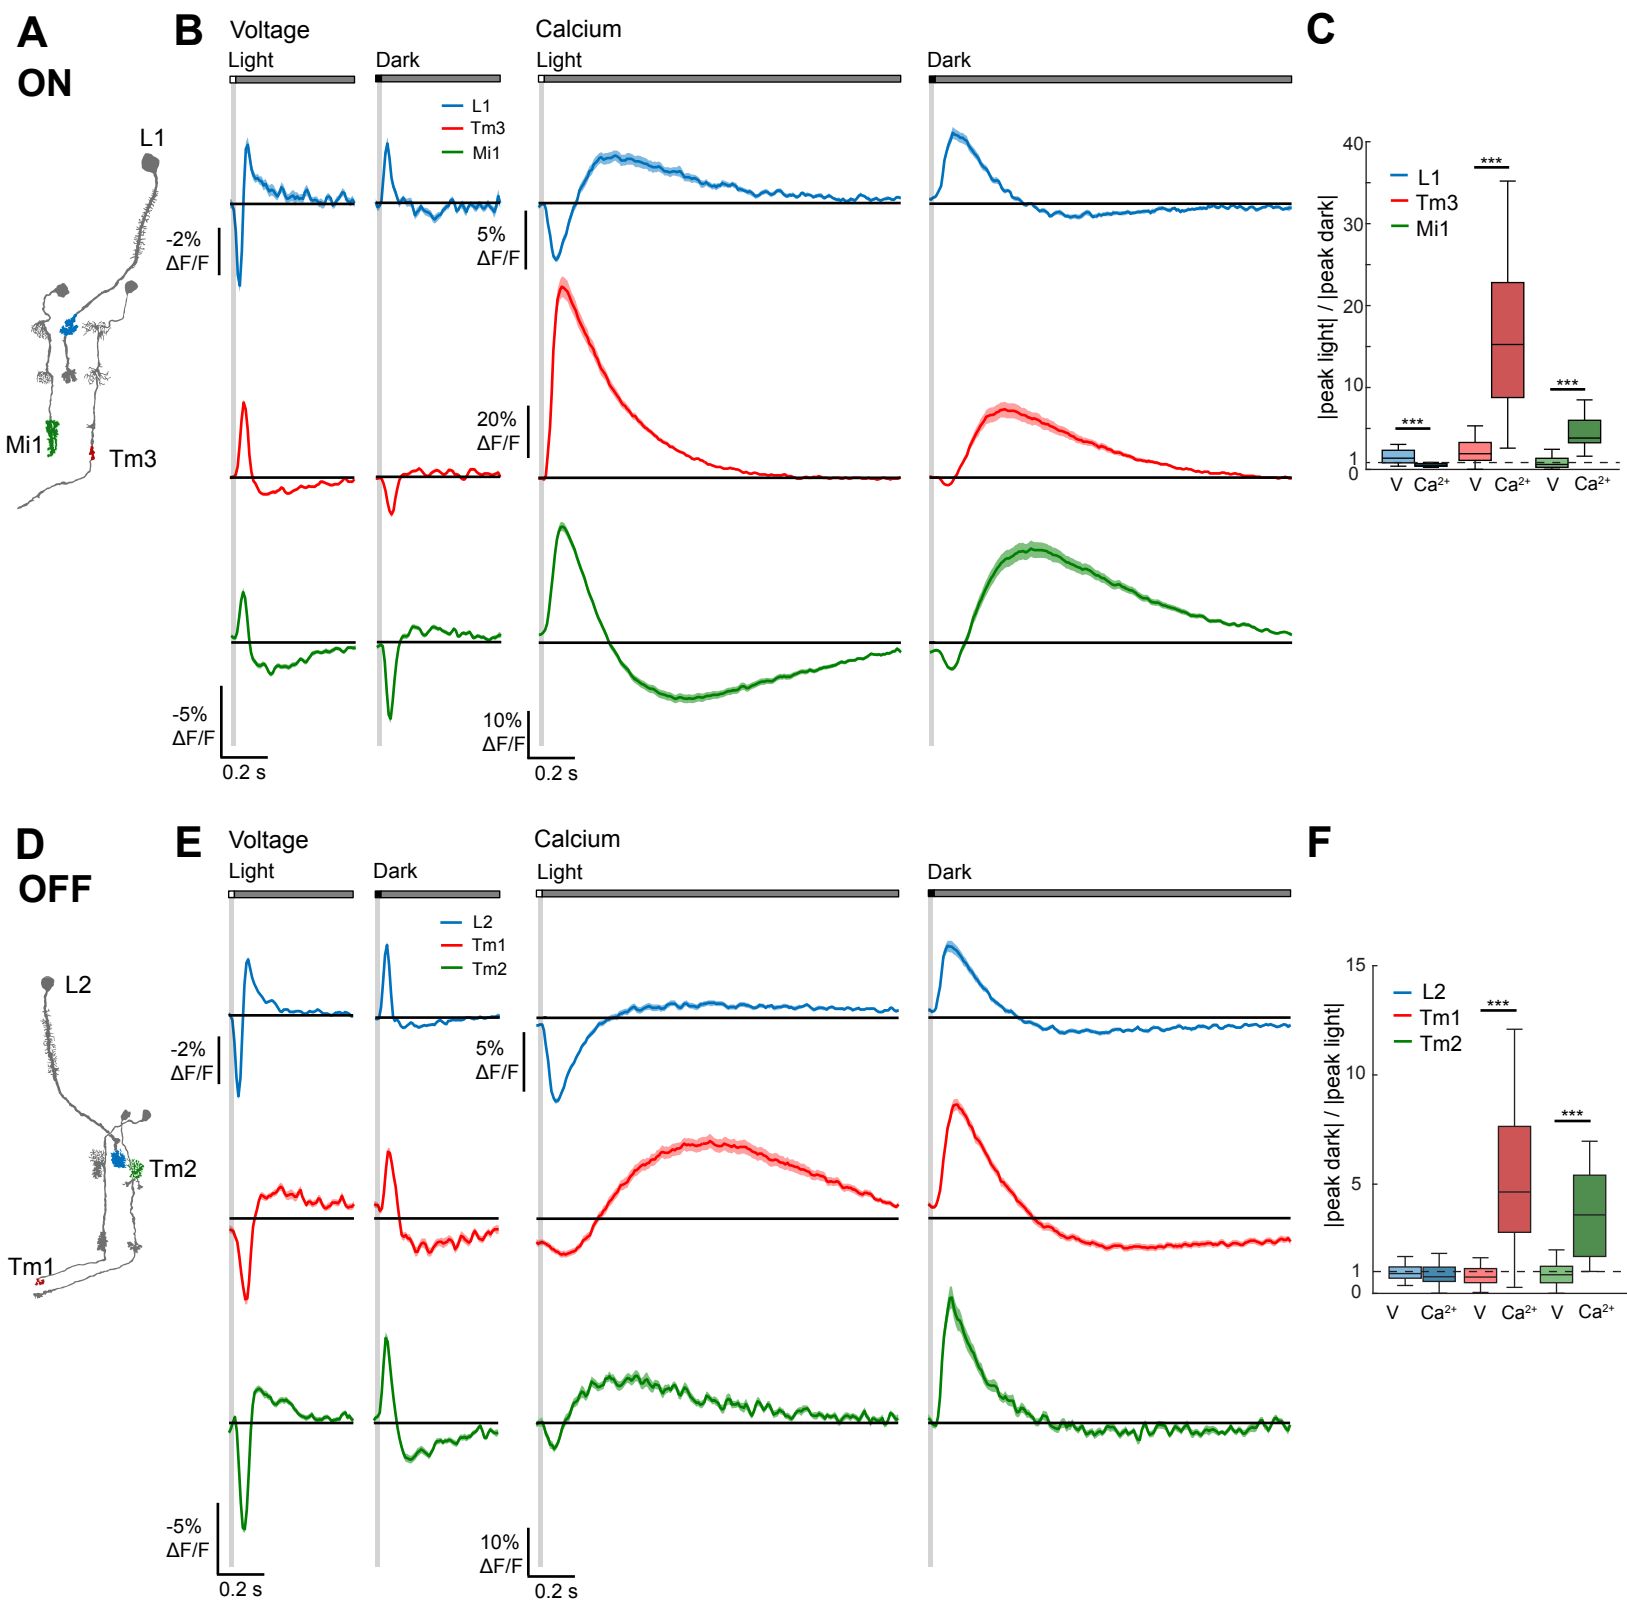

Supplement: NIHMS785612-supplement-5.pdf [file NIHMS785612-supplement-5.pdf]

# Yang Figure S6

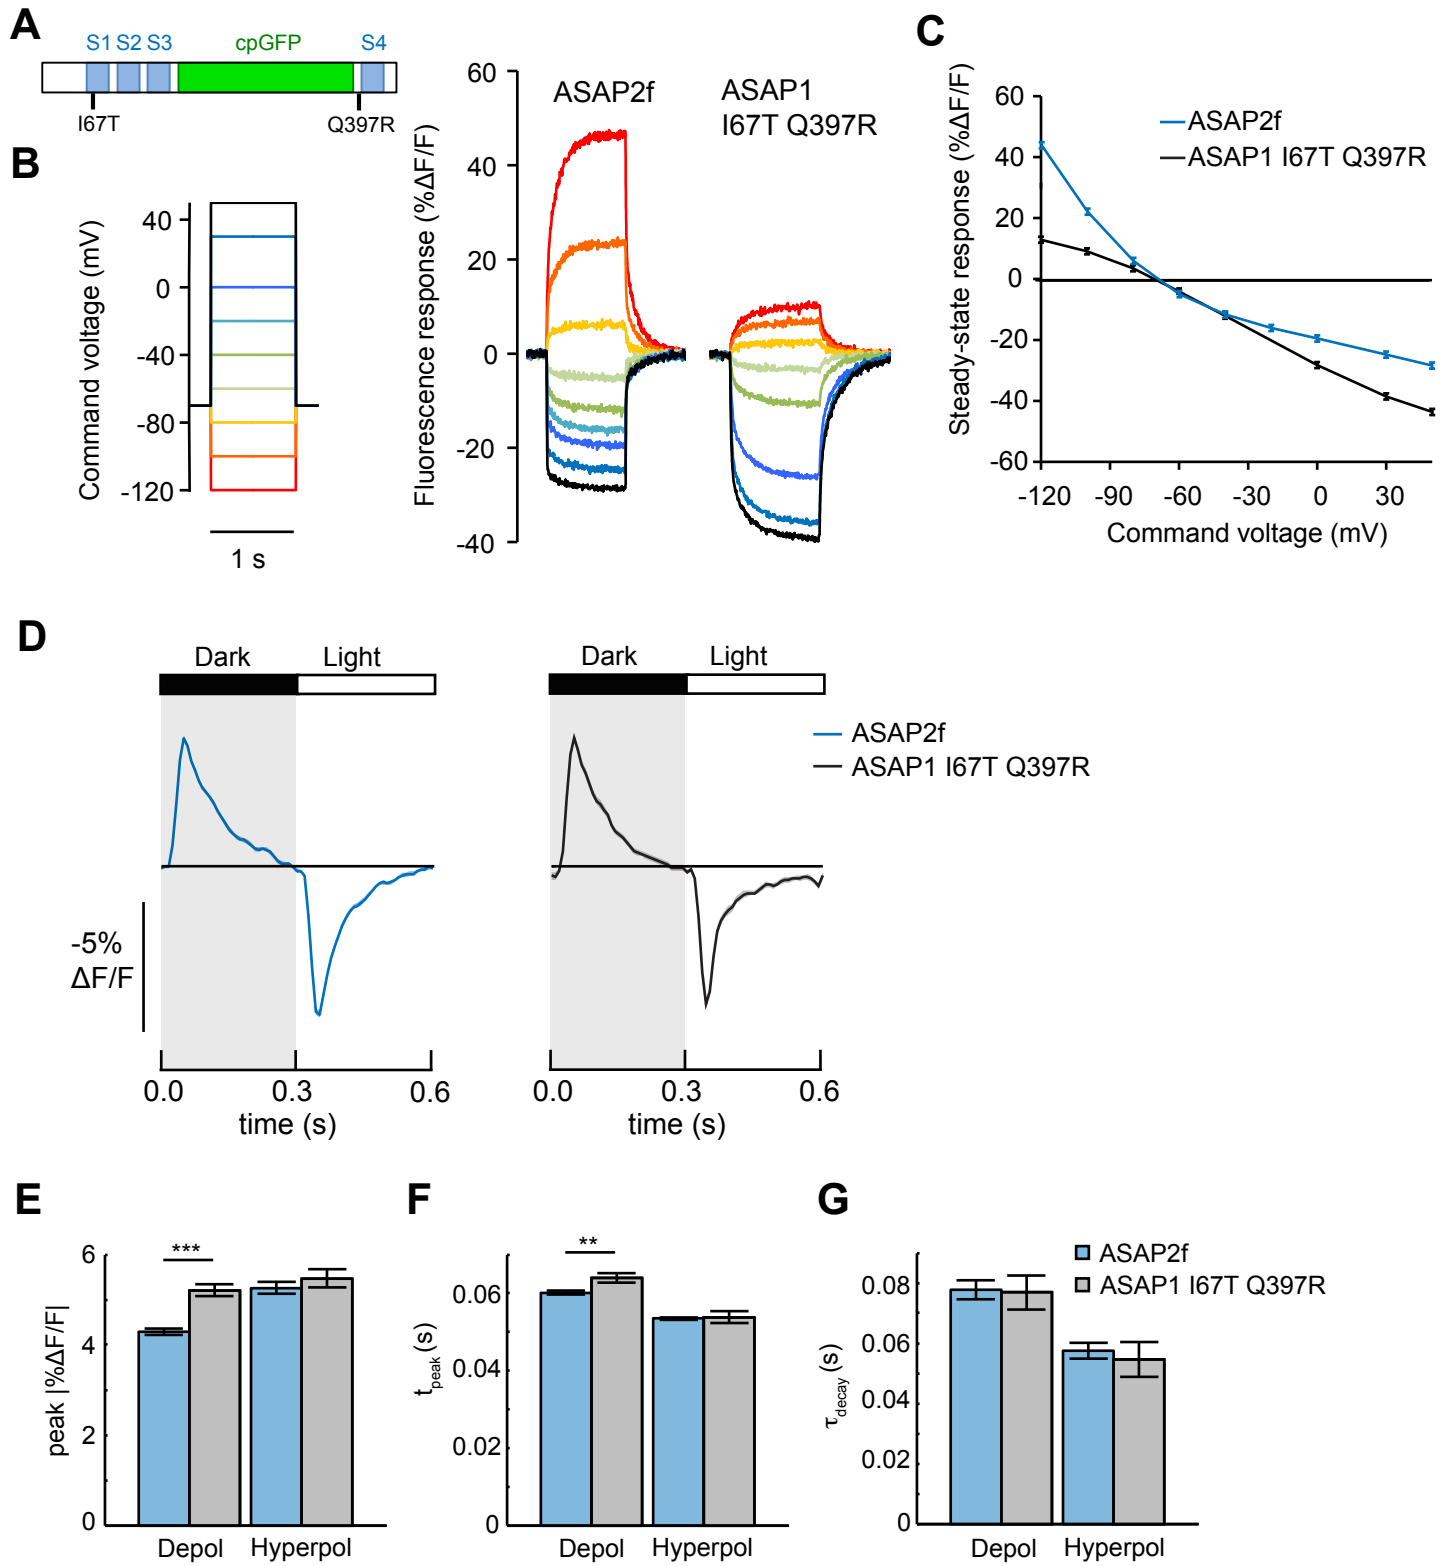

Supplement: NIHMS785612-supplement-6.pdf [file NIHMS785612-supplement-6.pdf]

# Yang Figure S7

## A L2 Layer M2

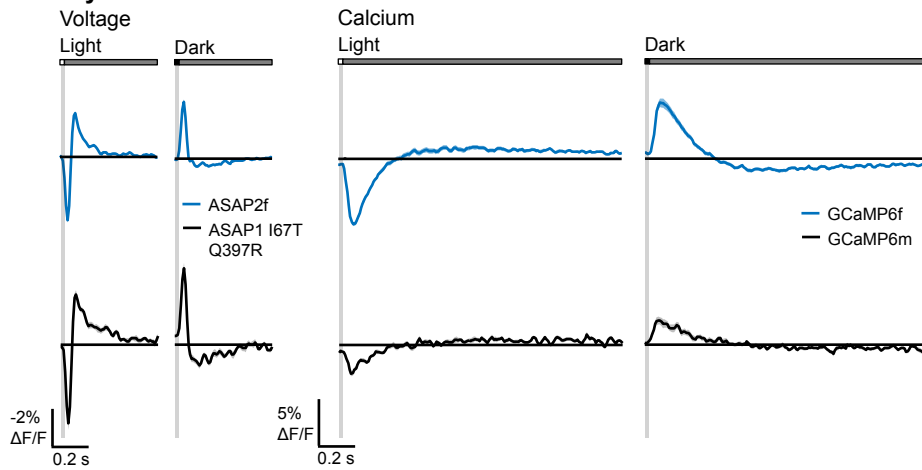

## B

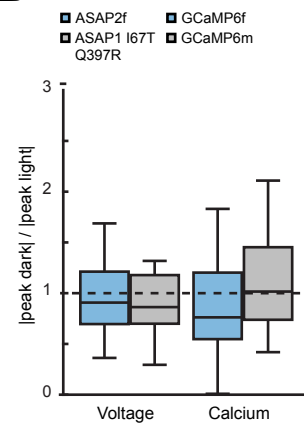

## C Tm1 Layer Lo1

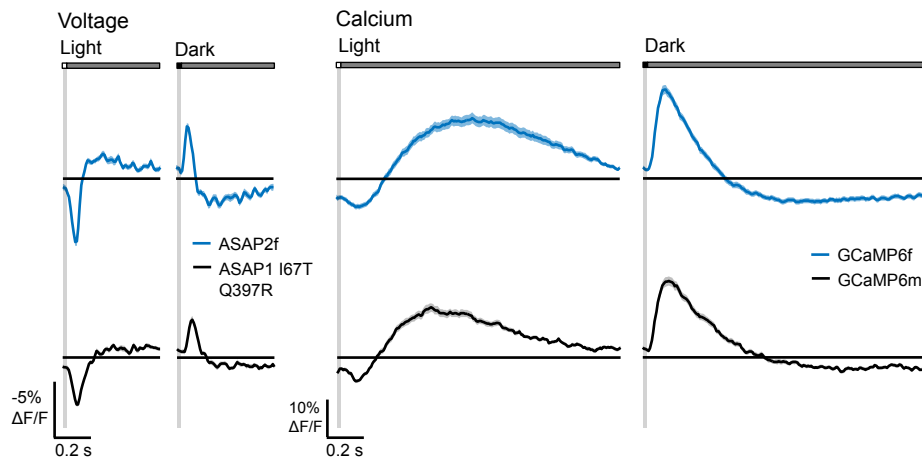

## D

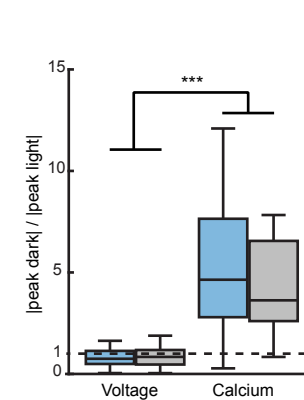

## E Tm3 Layer M10

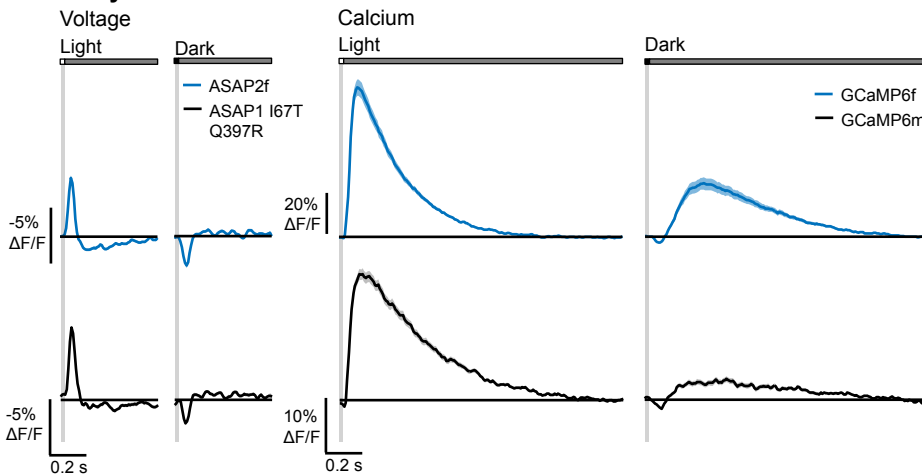

## F

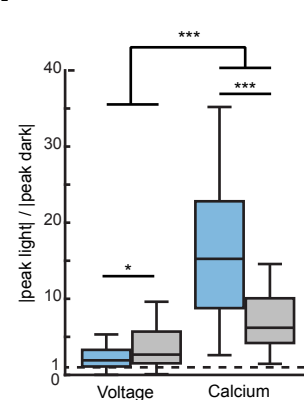

## G L2

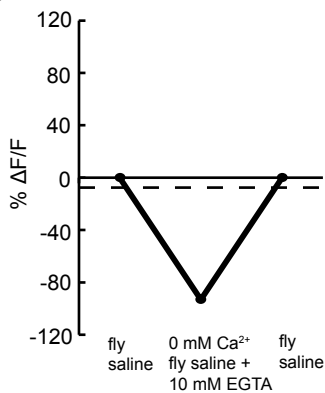

## H Tm1

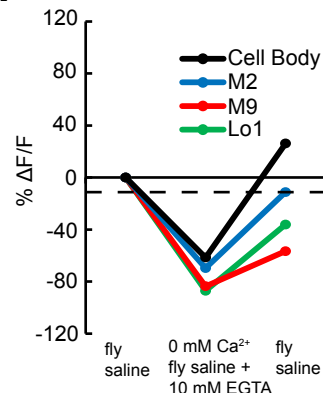

## I Tm3

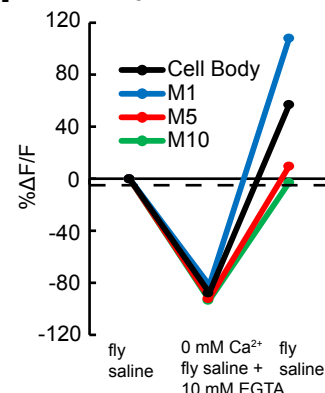

Supplement: NIHMS785612-supplement-7.pdf [file NIHMS785612-supplement-7.pdf]
